# Supplementary material for: Enhanced catalytic performance of a Pt-xCeO2/Graphene catalyst for DMFCs by adjusting the crystal-plane and shape of nanoscale ceria
Source: Royal Society of Chemistry journal article supplement (doi:10.1039/c5ra08144k), 2015-01-01
Supplement: c5ra08144k1.pdf [file c5ra08144k1.pdf]

Supporting Information for RSC Advances:

## Enhanced catalytic performance of a Pt-xCeO<sub>2</sub>/Graphene catalyst for DMFCs by adjusting the crystal-plane and shape of nanoscale ceria

Weihua Wang<sup>a</sup>, Mingda Zhu<sup>a</sup>, Xiaolin Lu<sup>a</sup>, Yanfang Gao<sup>\* a</sup>, Lijun Li<sup>\*1a</sup>, Zhenzhu Cao<sup>a</sup>, Caihong Li<sup>a</sup>, Jinrong Liu<sup>a</sup>, Haitao Zheng<sup>b</sup>

<sup>a</sup> College of Chemical Engineering, Inner Mongolia University of Technology, Hohhot, P. R. China.

<sup>b</sup> Materials Science and Manufacturing, Council for Scientific and Industrial Research (CSIR).

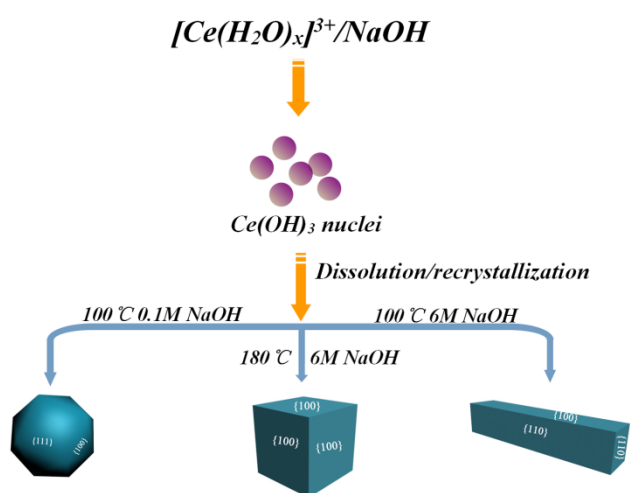

**Figure S1.** Schematic diagram for the shape-selective synthesis of CeO<sub>2</sub> nanopolyhedra, nanocubes and nanorods.

Figure S1 shows the shape-selective synthesis process of CeO<sub>2</sub> nanopolyhedra, nanocubes and nanorods. We use a simple hydrothermal method to synthesis different shape cerium oxide via adjusting hydrothermal temperature and NaOH concentration of the solution. According to the dissolution/recrystallization mechanism<sup>2,4</sup>, when Ce<sup>3+</sup> ions was mixed with NaOH solution, it formed anisotropic Ce(OH)<sub>3</sub> nuclei soon. At a low temperature of 100°C and low OH<sup>-</sup> concentrations, the dissolution/recrystallization rate was slow, there might exist inadequately high chemical potential for driving the anisotropic Ce(OH)<sub>3</sub> nuclei grew into CeO<sub>2</sub> nanopolyhedras. When the

NaOH concentration was improved, it promoted the  $\text{Ce}(\text{OH})_3$  nuclei to grow anisotropically and formed  $\text{CeO}_2$  nanorods. When the temperature rise to  $180^\circ\text{C}$ , the  $\text{Ce}(\text{OH})_3$  became unstable and was readily oxidized into  $\text{CeO}_2$  nanocubes.

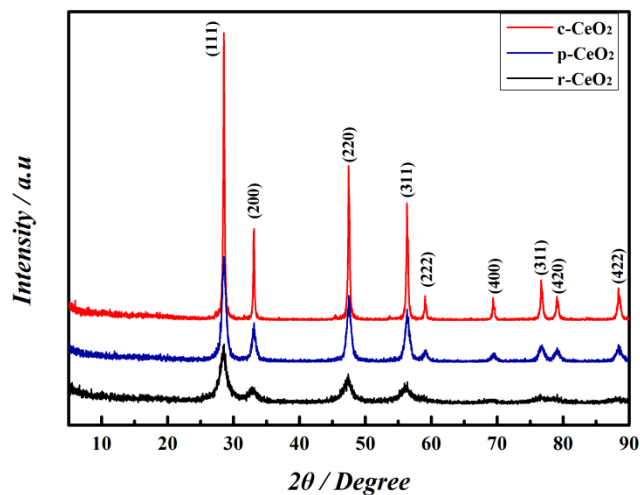

**Figure S2.** XRD patterns of rod-shaped  $\text{CeO}_2$ , cube-shaped  $\text{CeO}_2$ , polyhedra-shaped  $\text{CeO}_2$ .

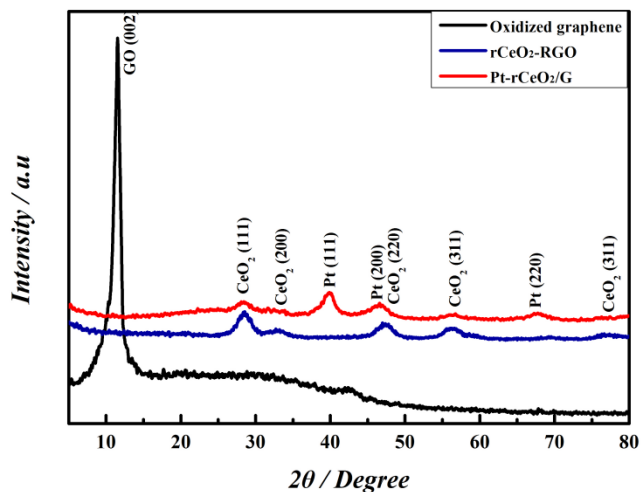

**Figure S3.** XRD patterns of graphene oxide (GO),  $\text{rCeO}_2/\text{RGO}$ ,  $\text{Pt-rCeO}_2/\text{Graphene}$  composites.

The XRD patterns of rod-shaped  $\text{CeO}_2$  ( $\text{rCeO}_2$ ), cube-shaped  $\text{CeO}_2$  ( $\text{cCeO}_2$ ), polyhedra-shaped  $\text{CeO}_2$  ( $\text{pCeO}_2$ ) are shown in Figure S2. The sharpness in the diffracted peaks suggests a good crystallinity of the  $\text{CeO}_2$  nanocrystals (JCPDS No. 34-0394). Figure S3 shows the XRD patterns

of graphene oxide (GO), rCeO<sub>2</sub>/RGO, Pt-rCeO<sub>2</sub>/graphene composites. Compared with the typical diffraction peak at ca. 10.06° in the XRD pattern of GO, the XRD pattern of the Pt-rCeO<sub>2</sub>/Graphene shows a broad, low intensity peak at ca. 24.9° and it is hardly to find a diffraction peak below 25° in the XRD pattern of rCeO<sub>2</sub>/RGO, indicating the reduction of oxidized graphene. The diffraction peaks at ca.39.8°, 46.2° and 67.5° in the Pt-rCeO<sub>2</sub>/G catalysts correspond to the face-centered cubic phase of Pt (JCPDS No. 04-0802). The other peaks at ca. 28.6°, 33.1°, 47.5°, 56.4° and 77.7° in Pt-rCeO<sub>2</sub>/G catalyst are consistent with the diffraction peaks of rCeO<sub>2</sub>/RGO which corresponded to the diffraction peaks of CeO<sub>2</sub> (JCPDS No. 34-0394).<sup>5,6</sup>

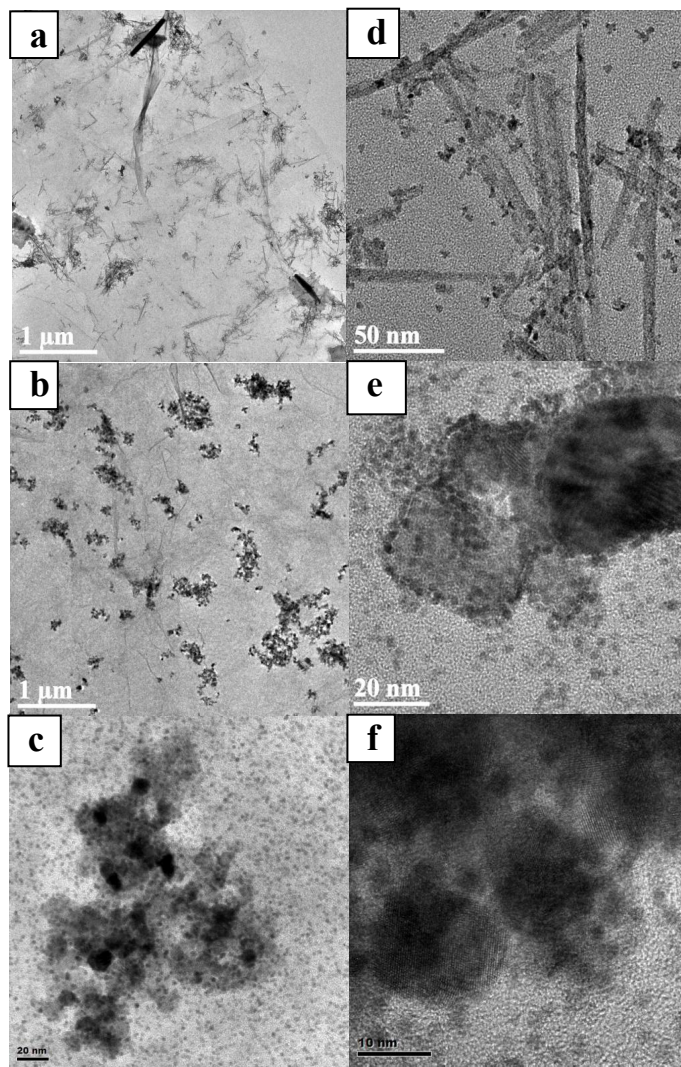

Figure S4. TEM images of Pt-rCeO<sub>2</sub>/Graphene (a, d), Pt-cCeO<sub>2</sub>/Graphene (b, e), and Pt-pCeO<sub>2</sub>/Graphene (c, f)

#### Reference

1. D. C. Marcano, D. V. Kosynkin, J. M. Berlin, A. Sinitskii, Z. Sun, A. Slesarev, L. B. Alemany, W. Lu and J. M. Tour, *ACS nano*, 2010, **4**, 4806.
2. H. X. Mai, L. D. Sun, Y. W. Zhang, R. Si, W. Feng, H. P. Zhang, H. C. Liu and C. H. Yan, *J. Phys. Chem. B*, 2005, **109**, 24380.
3. X. Yu, L. Kuai and B. Geng, *Nanoscale*, 2012, **4**, 5738.
4. M. Hirano, E. Kato, *J. Am. Ceram. Soc.* 1999, **82**, 786.
5. S. Yu, S. Liu, W. Yang, K. Han, Z. Wang, H. Zhu, *Electrochimica Acta*. 2013, **94**, 245.
6. M. A. Scibioh, M. A. Kim, E. A. Cho, T. H. Lim, T. H. Hong, H. Y. Ha, *Applied Catalysis B: Environmental*. 2008, **84**, 773.
